# Supplementary material for: Exploring the End-Use Quality Potential of a Collection of Spanish Bread Wheat Landraces
Source: MDPI journal article supplement (doi:10.3390/plants10040620), 2021-03-24
Supplement: s1 [file s1]

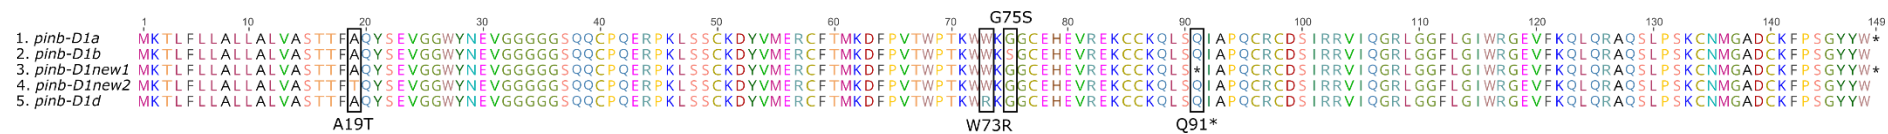

**Figure S1.** Alignment of Puroindoline b predicted protein sequence for each allele. Polymorphism characteristic of each allele is highlighted.

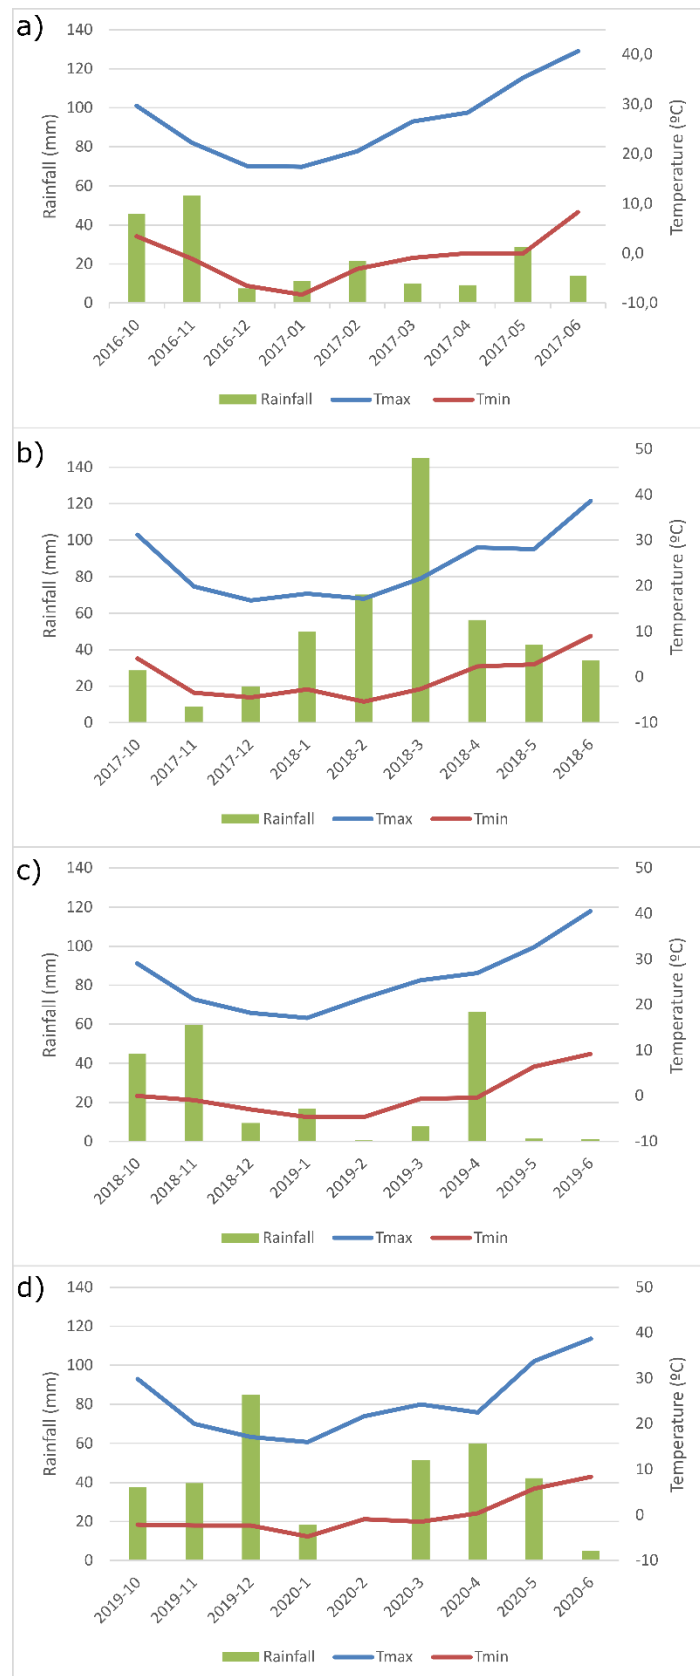

**Figure S2.** Monthly rainfall (mm) and mean maximum (Tmax, T°C) and minimum (Tmin, T°C) temperature recorded from October to June at the field trial sites during (a) 2016-2017, (b) 2017-2018, (c) 2018-2019 and (d) 2019-2020.

**Table S2.** Spearman's correlation among (A) traits, and (B) years for Thousand Kernel Weight (TKW), Grain Protein Content (GPC), Grain Number (GN) and SDS Sedimentation test (SDSS)

| (A)  |        |        |       |    |
|------|--------|--------|-------|----|
|      | GPC    | SDSS   | TKW   | GN |
| GPC  | 1      |        |       |    |
| SDSS | 0.074  | 1      |       |    |
| TKW  | -0.716 | -0.225 | 1     |    |
| GN   | -0.255 | 0.319  | 0.098 | 1  |

  

| (B)       |           |           |           |           |
|-----------|-----------|-----------|-----------|-----------|
| GPC       | 2016/2017 | 2017/2018 | 2018/2019 | 2019/2020 |
| 2016/2017 | 1         |           |           |           |
| 2017/2018 | 0.435     | 1         |           |           |
| 2018/2019 | 0.468     | 0.359     | 1         |           |
| 2019/2020 | 0.446     | 0.337     | 0.577     | 1         |

  

| SDSS      | 2016/2017 | 2017/2018 | 2018/2019 | 2019/2020 |
|-----------|-----------|-----------|-----------|-----------|
| 2016/2017 | 1         |           |           |           |
| 2017/2018 | 0.739     | 1         |           |           |
| 2018/2019 | 0.777     | 0.645     | 1         |           |
| 2019/2020 | 0.846     | 0.762     | 0.791     | 1         |

  

| TKW       | 2016/2017 | 2017/2018 | 2018/2019 | 2019/2020 |
|-----------|-----------|-----------|-----------|-----------|
| 2016/2017 | 1         |           |           |           |
| 2017/2018 | 0.501     | 1         |           |           |
| 2018/2019 | 0.430     | 0.354     | 1         |           |
| 2019/2020 | 0.568     | 0.569     | 0.475     | 1         |

  

| GN        | 2016/2017 | 2017/2018 | 2018/2019 | 2019/2020 |
|-----------|-----------|-----------|-----------|-----------|
| 2016/2017 | 1         |           |           |           |
| 2017/2018 | -         | 1         |           |           |
| 2018/2019 | -         | 0.395     | 1         |           |
| 2019/2020 | -         | 0.472     | 0.431     | 1         |

**Table S3.** Mean, standard deviation and F values for the effect of the *Glu-1* loci on the SDS Sedimentation test values (SDSS, mm)

|               | allele    | SDSS (mm) |         | F value |
|---------------|-----------|-----------|---------|---------|
|               |           | mean      | sd      |         |
| <i>Glu-A1</i> | <i>a</i>  | 52.14     | ± 22.00 | ***     |
|               | <i>b</i>  | 45.63     | ± 21.52 |         |
|               | <i>c</i>  | 50.91     | ± 21.10 |         |
|               | <i>y</i>  | 50.61     | ± 17.11 |         |
| <i>Glu-B1</i> | 7*+9      | 71.93     | ± 25.91 | ***     |
|               | <i>a</i>  | 54.23     | ± 17.39 |         |
|               | <i>al</i> | 53.50     | ± 25.47 |         |
|               | <i>am</i> | 46.17     | ± 12.05 |         |
|               | <i>aq</i> | 49.77     | ± 19.65 |         |
|               | <i>d</i>  | 44.70     | ± 14.52 |         |
|               | <i>e</i>  | 39.84     | ± 16.99 |         |
|               | <i>f</i>  | 57.92     | ± 20.13 |         |
|               | <i>i</i>  | 77.00     | ± 22.09 |         |
|               | <i>u</i>  | 56.71     | ± 21.58 |         |
| <i>Glu-D1</i> | <i>a</i>  | 50.60     | ± 20.06 | ***     |
|               | <i>c</i>  | 39.09     | ± 18.69 |         |
|               | <i>d</i>  | 68.44     | ± 28.58 |         |
|               | <i>l</i>  | 35.75     | ± 12.65 |         |

\* 0.05 > p > 0.05; \*\* 0.05 > p > 0.005; \*\*\* p < 0.005; ns: non significant.

**Table S4.** Wilcox test for *Glu-A1*, *Glu-B1* and *Glu-D1* alleles

| <i>Glu-A1</i> | <i>a</i> | <i>b</i> | <i>c</i> | <i>y</i> |
|---------------|----------|----------|----------|----------|
| <i>a</i>      | -        |          |          |          |
| <i>b</i>      | **       | -        |          |          |
| <i>c</i>      | ns       | *        | -        |          |
| <i>y</i>      | ns       | ***      | ns       | -        |

| <i>Glu-B1</i> | 7*+9 | <i>a</i> | <i>al</i> | <i>am</i> | <i>aq</i> | <i>d</i> | <i>e</i> | <i>f</i> | <i>i</i> | <i>u</i> |
|---------------|------|----------|-----------|-----------|-----------|----------|----------|----------|----------|----------|
| 7*+9          | -    |          |           |           |           |          |          |          |          |          |
| <i>a</i>      | ns   | -        |           |           |           |          |          |          |          |          |
| <i>al</i>     | ns   | ns       | -         |           |           |          |          |          |          |          |
| <i>am</i>     | *    | ns       | ns        | -         |           |          |          |          |          |          |
| <i>aq</i>     | ns   | ns       | ns        | ns        | -         |          |          |          |          |          |
| <i>d</i>      | ***  | ns       | ns        | ns        | ns        | -        |          |          |          |          |
| <i>e</i>      | ***  | **       | ns        | ns        | ns        | ns       | -        |          |          |          |
| <i>f</i>      | ns   | ns       | ns        | ns        | ns        | *        | ***      | -        |          |          |
| <i>i</i>      | ns   | ns       | ns        | *         | *         | **       | ***      | ns       | -        |          |
| <i>u</i>      | ns   | ns       | ns        | ns        | ns        | ns       | ***      | ns       | ns       | -        |

| <i>Glu-D1</i> | <i>a</i> | <i>c</i> | <i>d</i> | <i>l</i> |
|---------------|----------|----------|----------|----------|
| <i>a</i>      | -        |          |          |          |
| <i>c</i>      | ***      | -        |          |          |
| <i>d</i>      | **       | ***      | -        |          |
| <i>l</i>      | *        | ns       | **       | -        |

\* 0.05 > p > 0.05; \*\* 0.05 > p > 0.005; \*\*\* p < 0.005; ns: non significant.

**Table S5.** Mean and standard deviation of SDS Sedimentation test (mm) values for *Glu-1* alleles' combination

| Allele's combination | N  | mean  | sd      |
|----------------------|----|-------|---------|
| <i>a:d:a</i>         | 5  | 45.28 | ± 12.06 |
| <i>a:e:a</i>         | 10 | 40.39 | ± 17.79 |
| <i>b:7*+9:d</i>      | 3  | 90.21 | ± 24.57 |
| <i>b:a:a</i>         | 4  | 51.06 | ± 17.08 |
| <i>b:e:a</i>         | 37 | 43.93 | ± 18.37 |
| <i>b:e:c</i>         | 29 | 31.58 | ± 9.83  |
| <i>b:f:a</i>         | 5  | 58.48 | ± 17.76 |
| <i>b:u:a</i>         | 7  | 64.36 | ± 19.49 |
| <i>b:u:d</i>         | 3  | 46.75 | ± 16.15 |
| <i>c:d:a</i>         | 3  | 38.50 | ± 8.28  |
| <i>c:u:a</i>         | 14 | 47.11 | ± 19.32 |
| <i>y:e:a</i>         | 4  | 40.97 | ± 14.53 |
| <i>y:f:a</i>         | 19 | 56.90 | ± 17.68 |

**Table S6.** Wilcox test for alleles' combination *Glu-A1:Glu-B1:Glu-D1*

|                 | <i>a:d:a</i> | <i>a:e:a</i> | <i>b:7*+9:d</i> | <i>b:a:a</i> | <i>b:e:a</i> | <i>b:e:c</i> | <i>b:f:a</i> | <i>b:u:a</i> | <i>b:u:d</i> | <i>c:d:a</i> | <i>c:u:a</i> | <i>y:e:a</i> | <i>y:f:a</i> |
|-----------------|--------------|--------------|-----------------|--------------|--------------|--------------|--------------|--------------|--------------|--------------|--------------|--------------|--------------|
| <i>a:d:a</i>    | -            |              |                 |              |              |              |              |              |              |              |              |              |              |
| <i>a:e:a</i>    | ns           | -            |                 |              |              |              |              |              |              |              |              |              |              |
| <i>b:7*+9:d</i> | **           | ***          | -               |              |              |              |              |              |              |              |              |              |              |
| <i>b:a:a</i>    | ns           | ns           | *               | -            |              |              |              |              |              |              |              |              |              |
| <i>b:e:a</i>    | ns           | ns           | ***             | ns           | -            |              |              |              |              |              |              |              |              |
| <i>b:e:c</i>    | ***          | ns           | ***             | ***          | ***          | -            |              |              |              |              |              |              |              |
| <i>b:f:a</i>    | ns           | *            | ns              | ns           | *            | ***          | -            |              |              |              |              |              |              |
| <i>b:u:a</i>    | *            | ***          | ns              | ns           | ***          | ***          | ns           | -            |              |              |              |              |              |
| <i>b:u:d</i>    | ns           | ns           | ns              | ns           | ns           | ns           | ns           | ns           | -            |              |              |              |              |
| <i>c:d:a</i>    | ns           | ns           | *               | ns           | ns           | ns           | ns           | *            | ns           | -            |              |              |              |
| <i>c:u:a</i>    | ns           | ns           | ***             | ns           | ns           | ***          | ns           | *            | ns           | ns           | -            |              |              |
| <i>y:e:a</i>    | ns           | ns           | **              | ns           | ns           | ns           | ns           | *            | ns           | ns           | ns           | -            |              |
| <i>y:f:a</i>    | ns           | ***          | **              | ns           | ***          | ***          | ns           | ns           | ns           | ns           | ns           | ns           | -            |

\* 0.05 > p > 0.05; \*\* 0.05 > p > 0.005; \*\*\* p < 0.005; ns: non significant.

**Table S7.** Mean and standard deviation for SDS Sedimentation test (SDSS, mm), Grain Protein Content (GPC, %) and Thousand Kernel Weight (TKW, g) for a selected set of landraces, and their HMW-Gs composition

| Accession id | SDSS (mm)     | <i>Glu-A1</i> | <i>Glu-B1</i> | <i>Glu-D1</i> | GPC (%)      | TKW (g)       |
|--------------|---------------|---------------|---------------|---------------|--------------|---------------|
| BGE012591    | 100,83 ± 9,09 | <i>b</i>      | <i>e</i>      | <i>a</i>      | 14,81 ± 2,35 | 29,72 ± 1,10  |
| BGE008229    | 95,00 ± 30,25 | <i>b</i>      | 7*+9          | <i>d</i>      | 15,47 ± 3,44 | 30,30 ± 8,34  |
| BGE018228    | 95,00 ± 17,94 | <i>a</i>      | <i>f</i>      | <i>a</i>      | 16,37 ± 2,47 | 28,98 ± 11,04 |
| BGE008221    | 91,13 ± 18,89 | <i>b</i>      | 7*+9          | <i>d</i>      | 15,30 ± 3,04 | 35,46 ± 7,36  |
| BGE012111    | 90,88 ± 12,75 | <i>c</i>      | <i>u</i>      | <i>a</i>      | 15,68 ± 2,60 | 27,51 ± 4,72  |
| BGE008205    | 88,00 ± 24,42 | <i>a</i>      | <i>u</i>      | <i>a</i>      | 14,64 ± 3,18 | 27,05 ± 4,29  |
| BGE012205    | 84,88 ± 9,20  | <i>c</i>      | <i>e</i>      | <i>c</i>      | 15,49 ± 2,72 | 31,28 ± 4,72  |
| BGE012292    | 84,50 ± 29,44 | <i>b</i>      | 7*+9          | <i>d</i>      | 15,25 ± 2,79 | 28,83 ± 3,66  |
| BGE025410    | 84,25 ± 21,01 | <i>b</i>      | <i>i</i>      | <i>d</i>      | 13,76 ± 3,14 | 27,07 ± 7,12  |
| BGE025413    | 81,88 ± 20,18 | <i>b</i>      | <i>u</i>      | <i>a</i>      | 13,48 ± 2,48 | 29,63 ± 5,64  |
| BGE001944    | 80,13 ± 15,79 | <i>a</i>      | <i>f</i>      | <i>c</i>      | 14,81 ± 3,19 | 31,29 ± 9,78  |
| BGE012121    | 77,13 ± 23,26 | <i>b</i>      | <i>u</i>      | <i>a</i>      | 15,48 ± 3,14 | 32,42 ± 5,73  |
| BGE014290    | 76,00 ± 32,36 | <i>c</i>      | <i>al</i>     | <i>a</i>      | 16,59 ± 9,21 | 21,10 ± 5,17  |
| BGE024866    | 75,75 ± 13,60 | <i>a</i>      | <i>f</i>      | <i>c</i>      | 14,62 ± 2,35 | 30,94 ± 8,97  |
| BGE013795    | 75,13 ± 18,09 | <i>b</i>      | <i>e</i>      | <i>a</i>      | 13,61 ± 2,85 | 35,13 ± 9,64  |

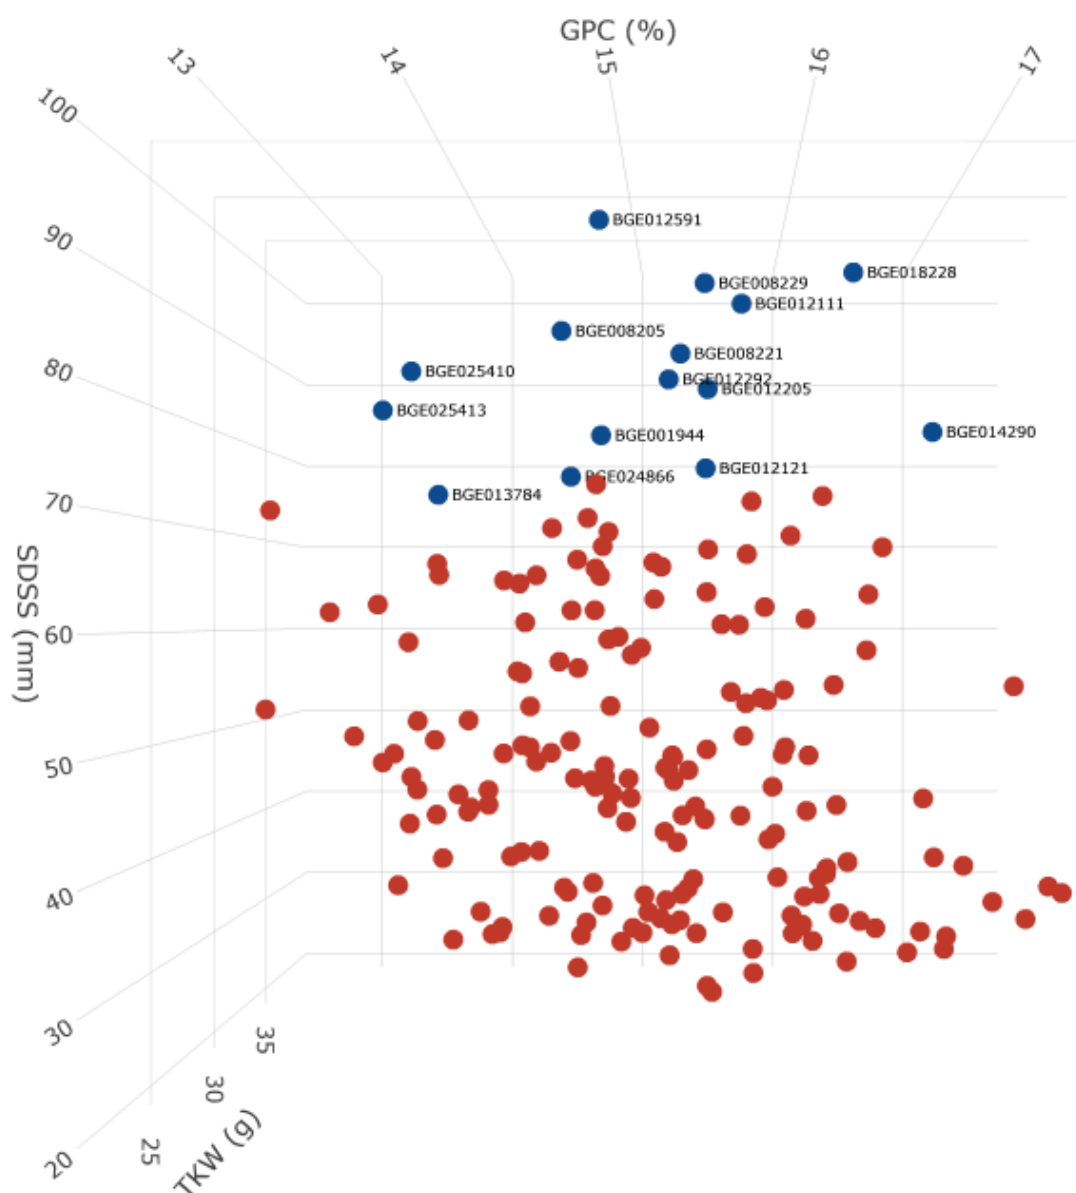

**Figure S3.** Set of fifteen landraces selected (in blue) based on SDS Sedimentation test values (SDSS, mm), Thousand Kernel Weight (TKW, g) and Grain Protein Content (GPC, %) to be further and deeply characterized in field trials.
